# Supplementary material for: A Machine Learning Model for Predicting Hospitalization in Patients with Respiratory Symptoms during the COVID-19 Pandemic
Source: MDPI journal article supplement (doi:10.3390/jcm11154574), 2022-08-05
Supplement: s1 [file s1]

# A Machine Learning Model for Predicting Hospitalization in Patients with Respiratory Symptoms during the COVID-19 Pandemic

**Victor Muniz De Freitas <sup>1</sup>, Daniela Mendes Chiloff <sup>1</sup>, Giulia Gabriella Bosso <sup>1</sup>, Janaina Oliveira Pires Teixeira <sup>1</sup>, Isabelle Cristina de Godói Hernandes <sup>1</sup>, Maira do Patrocínio Padilha <sup>1</sup>, Giovanna Corrêa Moura <sup>1</sup>, Luis Gustavo Modelli De Andrade <sup>2</sup>, Frederico Mancuso <sup>3</sup>, Francisco Estivallet Finamor <sup>3</sup>, Aluísio Marçal de Barros Serodio <sup>4</sup>, Jaqueline Sonoe Ota Arakaki <sup>5</sup>, Marair Gracio Ferreira Sartori <sup>6</sup>, Paulo Roberto Abrão Ferreira <sup>7</sup> and Érika Bevilaqua Rangel <sup>8,\*</sup>**

<sup>1</sup> Paulista School of Medicine, Hospital São Paulo, Federal University of São Paulo, São Paulo 04038-901, Brazil

<sup>2</sup> Department of Internal Medicine, Botucatu Medical School, University of São Paulo State, Botucatu 18618-687, Brazil

<sup>3</sup> Discipline of Emergency Medicine, Department of Medicine, Paulista School of Medicine, Hospital São Paulo, Federal University of São Paulo, São Paulo 04038-901, Brazil

<sup>4</sup> Sector of Bioethics, Department of Surgery, Paulista School of Medicine, Hospital São Paulo, Federal University of São Paulo, São Paulo 04038-901, Brazil

<sup>5</sup> Pneumology Division, Department of Medicine, Paulista School of Medicine, Hospital São Paulo, Federal University of São Paulo, São Paulo 04038-901, Brazil

<sup>6</sup> Department of Obstetrics, Paulista School of Medicine, Hospital São Paulo, Federal University of São Paulo, São Paulo 04038-901, Brazil

<sup>7</sup> Infectious Disease Division, Department of Medicine, Paulista School of Medicine, Hospital São Paulo, Federal University of São Paulo, São Paulo 04038-901, Brazil

<sup>8</sup> Nephrology Division, Department of Medicine, Paulista School of Medicine, Hospital São Paulo, Federal University of São Paulo, São Paulo 04038-901, Brazil

\* Correspondence: erikabr@uol.com.br.

**Table S1.** Comparison of demography, signs, symptoms, and comorbidities between patients who required hospitalization and those who did not require hospitalization from March to August-2000 at Hospital São Paulo, Brazil.

| Variables                       | No Hospitalization (n=6596) |                     | Hospitalization (n=740) |                     | <i>P</i> |
|---------------------------------|-----------------------------|---------------------|-------------------------|---------------------|----------|
|                                 | Median                      | Interquartile range | Median                  | Interquartile range |          |
| Females (n, %)                  | 3570 (54%)                  |                     | 324 (44%)               |                     | <0.001   |
| Age (years-old)                 | 39                          | (28, 51)            | 58                      | (47, 69)            | <0.001   |
| Duration of symptoms (days)     | 4                           | (2, 8)              | 7                       | (4, 10)             | <0.001   |
| Missing data                    | 1452                        |                     | 323                     |                     |          |
| Systolic blood pressure (mmHg)  | 133                         | (121, 146)          | 129                     | (114, 145)          | <0.001   |
| Unknown                         | 1091                        |                     | 298                     |                     |          |
| Diastolic blood pressure (mmHg) | 84                          | (75, 94)            | 80                      | (70, 90)            | <0.001   |
| Unknown                         | 1103                        |                     | 300                     |                     |          |
| Heart rate (bpm)                | 90                          | (80, 101)           | 96                      | (85, 110)           | <0.001   |
| Unknown                         | 1223                        |                     | 298                     |                     |          |
| Temperature (°C)                | 36.50                       | (36.00, 36.80)      | 36.50                   | (36.00, 36.90)      | 0.007    |
| Unknown                         | 1214                        |                     | 329                     |                     |          |
| Respiratory rate (bpm)          | 18                          | (16, 20)            | 24                      | (20, 28)            | <0.001   |
| Unknown                         | 1634                        |                     | 320                     |                     |          |
| SpO <sub>2</sub> (%)            | 97.00                       | (96.00, 98.00)      | 94.00                   | (90.00, 96.00)      | <0.001   |
| Unknown                         | 1038                        |                     | 280                     |                     |          |
| Influenza vaccine (yes, %)      | 1897 (39%)                  |                     | 149 (47%)               |                     | 0.007    |
| Unknown                         | 1743                        |                     | 421                     |                     |          |
| Fever (n, %)                    | 2500 (42%)                  |                     | 289 (57%)               |                     | <0.001   |
| Unknown                         | 632                         |                     | 236                     |                     |          |
| Fatigue (n, %)                  | 1628 (27%)                  |                     | 184 (37%)               |                     | <0.001   |
| Unknown                         | 632                         |                     | 236                     |                     |          |
| Sneezing (n, %)                 | 496 (8.3%)                  |                     | 20 (4.0%)               |                     | <0.001   |
| Unknown                         | 630                         |                     | 236                     |                     |          |
| Dry cough (n, %)                | 2702 (45%)                  |                     | 262 (52%)               |                     | 0.004    |
| Unknown                         | 631                         |                     | 236                     |                     |          |
| Productive cough (n, %)         | 720 (12%)                   |                     | 75 (15%)                |                     | 0.065    |
| Unknown                         | 632                         |                     | 236                     |                     |          |
| Running nose (n, %)             | 1304 (22%)                  |                     | 45 (8.9%)               |                     | <0.001   |
| Unknown                         | 634                         |                     | 236                     |                     |          |
| Sore throat (n, %)              | 1428 (24%)                  |                     | 38 (7.6%)               |                     | <0.001   |
| Unknown                         | 634                         |                     | 237                     |                     |          |
| Diarrhoea (n, %)                | 851 (14%)                   |                     | 88 (17%)                |                     | 0.051    |
| Unknown                         | 632                         |                     | 236                     |                     |          |
| Breathing difficulty (n, %)     | 1955 (33%)                  |                     | 302 (60%)               |                     | <0.001   |
| Unknown                         | 632                         |                     | 237                     |                     |          |
| Anorexia (n, %)                 | 614 (10%)                   |                     | 94 (19%)                |                     | <0.001   |
| Unknown                         | 631                         |                     | 236                     |                     |          |

|                                   |            |           |        |
|-----------------------------------|------------|-----------|--------|
| Headache (n, %)                   | 2219 (37%) | 93 (18%)  | <0.001 |
| Unknown                           | 632        | 236       |        |
| Myalgia (n, %)                    | 1845 (31%) | 138 (27%) | 0.10   |
| Unknown                           | 630        | 237       |        |
| Nausea/vomiting (n, %)            | 735 (12%)  | 91 (18%)  | <0.001 |
| Unknown                           | 629        | 239       |        |
| Wheezing (n, %)                   | 136 (2.3%) | 11 (2.2%) | 0.9    |
| Unknown                           | 631        | 236       |        |
| Thoracic pain (n, %)              | 1059 (18%) | 67 (13%)  | 0.012  |
| Unknown                           | 631        | 237       |        |
| Abdominal pain (n, %)             | 320 (5.4%) | 34 (6.7%) | 0.2    |
| Unknown                           | 630        | 236       |        |
| Anosmia (n, %)                    | 1133 (19%) | 80 (16%)  | 0.084  |
| Unknown                           | 633        | 236       |        |
| Dysgeusia (n, %)                  | 1127 (19%) | 80 (16%)  | 0.10   |
| Unknown                           | 632        | 237       |        |
| Chills (n, %)                     | 672 (11%)  | 46 (9.1%) | 0.14   |
| Unknown                           | 630        | 236       |        |
| Hypertension (n, %)               | 1227 (21%) | 232 (46%) | <0.001 |
| Unknown                           | 621        | 236       |        |
| Cardiac disease (n, %)            | 227 (3.8%) | 68 (14%)  | <0.001 |
| Unknown                           | 617        | 237       |        |
| Diabetes mellitus (n, %)          | 469 (7.8%) | 136 (27%) | <0.001 |
| Unknown                           | 619        | 235       |        |
| Cerebrovascular disease (n, %)    | 42 (0.7%)  | 17 (3.4%) | <0.001 |
| Unknown                           | 620        | 235       |        |
| Chronic kidney disease (n, %)     | 162 (2.7%) | 66 (13%)  | <0.001 |
| Unknown                           | 621        | 235       |        |
| Immunosuppression (n, %)          | 230 (3.8%) | 55 (11%)  | <0.001 |
| Unknown                           | 617        | 236       |        |
| COPD (n, %)                       | 95 (1.6%)  | 13 (2.6%) | 0.10   |
| Unknown                           | 621        | 235       |        |
| Asthma (n, %)                     | 355 (5.9%) | 19 (3.8%) | 0.044  |
| Unknown                           | 620        | 235       |        |
| Tuberculosis (n, %)               | 39 (0.7%)  | 6 (1.2%)  | 0.2    |
| Unknown                           | 618        | 235       |        |
| Other respiratory diseases (n, %) | 87 (1.5%)  | 12 (2.4%) | 0.10   |
| Unknown                           | 617        | 235       |        |
| Neoplasia (n, %)                  | 89 (1.5%)  | 30 (6.0%) | <0.001 |
| Unknown                           | 622        | 236       |        |
| Solid-organ transplant (n, %)     | 145 (2.4%) | 63 (12%)  | <0.001 |
| Unknown                           | 619        | 235       |        |

|                                 |            |           |        |
|---------------------------------|------------|-----------|--------|
| Obesity (n, %)                  | 305 (5.1%) | 56 (11%)  | <0.001 |
| Unknown                         | 617        | 236       |        |
| Smoking (n, %)                  | 621 (10%)  | 45 (8.9%) | 0.3    |
| Unknown                         | 616        | 235       |        |
| Pregnancy (n, %)                | 79 (1.3%)  | 3 (0.6%)  | 0.2    |
| Unknown                         | 618        | 235       |        |
| Previous hospitalization (n, %) | 37 (0.6%)  | 23 (4.5%) | <0.001 |
| Unknown                         | 623        | 233       |        |

SpO<sub>2</sub>: oxyhemoglobin saturation by pulse oximetry; COPD: Chronic obstructive pulmonary disease.

**Table S2.** Predictors and missing values numbers used in predicting hospitalization in patients with respiratory symptoms during the COVID-19 pandemic.

| <b>Variable</b>         | <b>N<br/>(not missing)</b> | <b>N<br/>(missing)</b> | <b>Missing (%)</b> |
|-------------------------|----------------------------|------------------------|--------------------|
| Sex                     | 7336                       | 0                      | 0.0                |
| Age                     | 7336                       | 0                      | 0.0                |
| Symptom Duration        | 5561                       | 1775                   | 24.2               |
| Date symptoms           | 5578                       | 1758                   | 24.0               |
| Systolic pressure       | 5947                       | 1389                   | 18.9               |
| Diastolic pressure      | 5933                       | 1403                   | 19.1               |
| Heart Rate              | 5815                       | 1521                   | 20.7               |
| Temperature             | 5793                       | 1543                   | 21.0               |
| Respiratory frequency   | 5382                       | 1954                   | 26.6               |
| SpO <sub>2</sub>        | 6018                       | 1318                   | 18.0               |
| Influenza Vaccine       | 5172                       | 2164                   | 29.5               |
| Fever                   | 6468                       | 868                    | 11.8               |
| Fatigue                 | 6468                       | 868                    | 11.8               |
| Cough                   | 6470                       | 866                    | 11.8               |
| Dry cough               | 6469                       | 867                    | 11.8               |
| Phlegm cough            | 6468                       | 868                    | 11.8               |
| Running nose            | 6466                       | 870                    | 11.9               |
| Sore throat             | 6465                       | 871                    | 11.9               |
| Diarrhea                | 6468                       | 868                    | 11.8               |
| Dyspnea                 | 6467                       | 869                    | 11.8               |
| Anorexia                | 6469                       | 867                    | 11.8               |
| Headache                | 6468                       | 868                    | 11.8               |
| Myalgia                 | 6469                       | 867                    | 11.8               |
| Nausea and vomiting     | 6468                       | 868                    | 11.8               |
| Chest wheezing          | 6469                       | 867                    | 11.8               |
| Chest pain              | 6468                       | 868                    | 11.8               |
| Abdominal pain          | 6470                       | 866                    | 11.8               |
| Anosmia                 | 6467                       | 869                    | 11.8               |
| Dysgeusia               | 6467                       | 869                    | 11.8               |
| Chills                  | 6470                       | 866                    | 11.8               |
| Hypertension            | 6479                       | 857                    | 11.7               |
| Heart disease           | 6482                       | 854                    | 11.6               |
| Diabetes mellitus       | 6482                       | 854                    | 11.6               |
| Cerebrovascular disease | 6481                       | 855                    | 11.7               |
| Chronic kidney disease  | 6480                       | 856                    | 11.7               |
| Immunosuppression       | 6483                       | 853                    | 11.6               |
| COPD                    | 6480                       | 856                    | 11.7               |
| Asthma                  | 6481                       | 855                    | 11.7               |

|                       |      |     |      |
|-----------------------|------|-----|------|
| Tuberculosis          | 6483 | 853 | 11.6 |
| Respiratory disease   | 6484 | 852 | 11.6 |
| Neoplasia             | 6478 | 858 | 11.7 |
| Transplant            | 6482 | 854 | 11.6 |
| Obesity               | 6483 | 853 | 11.6 |
| Smoking               | 6485 | 851 | 11.6 |
| Pregnant              | 6483 | 853 | 11.6 |
| Prior hospitalization | 6480 | 856 | 11.7 |
| Hospitalization       | 7336 | 0   | 0.0  |
| Death                 | 7336 | 0   | 0.0  |

---

SpO<sub>2</sub>: oxyhemoglobin saturation by pulse oximetry; COPD: Chronic obstructive pulmonary disease.
